# Supplementary material for: Protonated glycine supramolecular systems: the need for quantum dynamics
Source: Royal Society of Chemistry journal article supplement (doi:10.1039/c8sc03041c), 2018-01-01
Supplement: c8sc03041c1.pdf [file c8sc03041c1.pdf]

## Supporting Informations

Fabio Gabas, Giovanni Di Liberto, Riccardo Conte,\* and Michele Ceotto\*

E-mail: riccardo.conte1@unimi.it; michele.ceotto@unimi.it

### CS01, CS02, and ZW01 isomers

Figure (S1) shows the optimized structures of CS01, CS02, and ZW01 calculated at the DFT-B3LYP level of theory with 6-311+G\*\* basis set by means of the NWChem package.<sup>1</sup> CS01 is the global minimum, while CS02 and ZW01 are isomers respectively 650 cm<sup>-1</sup> and 950 cm<sup>-1</sup> above in energy.

Figure S1: Structures of the CS01, ZW01, and CS02 isomers of the protonated glycine dimer. The left side of the panel shows the CS01 structure, the right one its zwitterionic version (ZW01), while the CS02 local minimum is reported below.

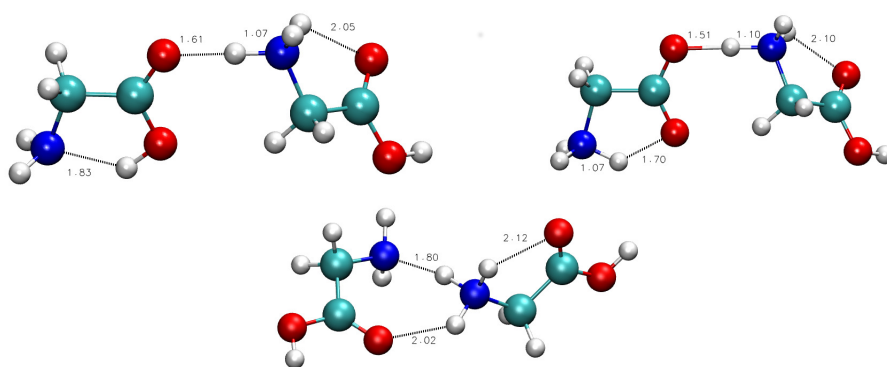

Tables (S1), (S2), and (S3) report instead the computed harmonic frequencies in the 1000-4000 cm<sup>-1</sup> energy range, obtained via diagonalization of the Hessian matrix at the equilibrium geometry.

Table S1: Harmonic vibrational frequencies of the CS01 isomer reported in  $\text{cm}^{-1}$ . Values are presented in ascending order.

| Mode | HO   | Mode | HO   | Mode | HO   |
|------|------|------|------|------|------|
| 26   | 1020 | 37   | 1435 | 48   | 3059 |
| 27   | 1075 | 38   | 1443 | 49   | 3084 |
| 28   | 1133 | 39   | 1461 | 50   | 3101 |
| 29   | 1159 | 40   | 1485 | 51   | 3142 |
| 30   | 1178 | 41   | 1570 | 52   | 3191 |
| 31   | 1192 | 42   | 1669 | 53   | 3309 |
| 32   | 1246 | 43   | 1675 | 54   | 3499 |
| 33   | 1315 | 44   | 1686 | 55   | 3537 |
| 34   | 1338 | 45   | 1756 | 56   | 3610 |
| 35   | 1339 | 46   | 1811 | 57   | 3730 |
| 36   | 1351 | 47   | 2707 |      |      |

Table S2: Harmonic vibrational frequencies of CS02 isomer reported in  $\text{cm}^{-1}$ . Values are presented in ascending order.

| Mode | HO   | Mode | HO   | Mode | HO   |
|------|------|------|------|------|------|
| 25   | 1036 | 36   | 1362 | 47   | 2707 |
| 26   | 1054 | 37   | 1438 | 48   | 3048 |
| 27   | 1091 | 38   | 1447 | 49   | 3086 |
| 28   | 1117 | 39   | 1479 | 50   | 3087 |
| 29   | 1156 | 40   | 1485 | 51   | 3138 |
| 30   | 1186 | 41   | 1593 | 52   | 3359 |
| 31   | 1194 | 42   | 1662 | 53   | 3431 |
| 32   | 1202 | 43   | 1665 | 54   | 3481 |
| 33   | 1305 | 44   | 1700 | 55   | 3546 |
| 34   | 1319 | 45   | 1784 | 56   | 3727 |
| 35   | 1334 | 46   | 1817 | 57   | 3734 |

Table S3: Harmonic Vibrational frequencies of the ZW01 isomer reported in  $\text{cm}^{-1}$ . Values are presented in ascending order.

| Mode | HO   | Mode | HO   | Mode | HO   |
|------|------|------|------|------|------|
| 25   | 1032 | 36   | 1416 | 47   | 2253 |
| 26   | 1089 | 37   | 1442 | 48   | 2814 |
| 27   | 1098 | 38   | 1483 | 49   | 3058 |
| 28   | 1141 | 39   | 1488 | 50   | 3107 |
| 29   | 1165 | 40   | 1594 | 51   | 3133 |
| 30   | 1192 | 41   | 1638 | 52   | 3166 |
| 31   | 1295 | 42   | 1661 | 53   | 3350 |
| 32   | 1309 | 43   | 1674 | 54   | 3471 |
| 33   | 1321 | 44   | 1685 | 55   | 3509 |
| 34   | 1345 | 45   | 1696 | 56   | 3534 |
| 35   | 1385 | 46   | 1812 | 57   | 3735 |

Values well agree with the ones reported in the literature for CS01 and CS02 at the same level of theory, as reported in Table (S4).

Table S4: Harmonic frequencies of CS01 and CS02 compared with the corresponding ones reported in the literature, calculated at the same level of theory. Values labeled by <sup>(a)</sup> are taken from Ref ( 2).

| CS01 | HO   | HO <sup>(a)</sup> | CS02 | HO   | HO <sup>(a)</sup> |
|------|------|-------------------|------|------|-------------------|
|      | 1192 | 1194              |      | 3431 | 3438              |
|      | 1756 | 1763              |      | 3546 | 3546              |
|      | 1811 | 1816              |      | 3734 | 3738              |
|      | 3499 | 3501              |      |      |                   |
|      | 3610 | 3610              |      |      |                   |
|      | 3730 | 3731              |      |      |                   |

Below are reported the computed DC SCIVR fundamental frequencies of CS01 and CS02, compared with the experimental ones. Table (S5) shows the fundamental excitations of CS01 in the 1000-4000  $\text{cm}^{-1}$  energy range, while Table (S6) the fundamental excitations of CS02.

Table S5: Vibrational frequencies of the CS01 isomer reported in  $\text{cm}^{-1}$ . Values are compared with their harmonic and experimental counterparts. The Mean Absolute Error (MAE) is computed with respect to the experimental vibrational excitations.

| Mode | DC-SCIIVR | HO   | Exp[ 2] | Mode | DC-SCIIVR | HO   | Exp[ 2] |
|------|-----------|------|---------|------|-----------|------|---------|
| 26   | 1003      | 1020 |         | 43   | 1633      | 1675 |         |
| 27   | 1074      | 1075 |         | 44   | 1641      | 1686 |         |
| 28   | 1108      | 1133 |         | 45   | 1750      | 1756 | 1757    |
| 29   | 1109      | 1159 |         | 46   | 1804      | 1811 | 1808    |
| 30   | 1174      | 1178 |         | 47   | 2658      | 2707 |         |
| 31   | 1172      | 1192 | 1191    | 48   | 2959      | 3059 |         |
| 32   | 1188      | 1246 |         | 49   | 2987      | 3084 |         |
| 33   | 1267      | 1315 |         | 50   | 2966      | 3101 |         |
| 34   | 1340      | 1338 |         | 51   | 3051      | 3142 |         |
| 35   | 1320      | 1339 |         | 52   | 3197      | 3191 |         |
| 36   | 1320      | 1351 |         | 53   | 3243      | 3309 |         |
| 37   | 1386      | 1435 |         | 54   | 3375      | 3499 | 3372    |
| 38   | 1344      | 1443 |         | 55   | 3415      | 3537 |         |
| 39   | 1450      | 1461 | 1439    | 56   | 3435      | 3610 |         |
| 40   | 1434      | 1485 |         | 57   | 3628      | 3730 | 3585    |
| 41   | 1511      | 1570 | 1523    |      |           |      |         |
| 42   | 1629      | 1669 |         | MAE  | 14        |      |         |

Table S6: Vibrational frequencies of the CS02 isomer reported in  $\text{cm}^{-1}$ . Values are compared with their harmonic and experimental counterparts. The Mean Absolute Error (MAE) is computed with respect to the experimental vibrational excitations.

| Mode | DC-SCIIVR | HO   | Exp[ 2] | Mode | DC-SCIIVR | HO   | Exp[ 2] |
|------|-----------|------|---------|------|-----------|------|---------|
| 25   | 1033      | 1036 |         | 42   | 1617      | 1662 |         |
| 26   | 1015      | 1054 |         | 43   | 1598      | 1665 | 1523    |
| 27   | 1050      | 1091 |         | 44   | 1610      | 1700 |         |
| 28   | 1095      | 1117 |         | 45   | 1771      | 1784 | 1757    |
| 29   | 1106      | 1156 |         | 46   | 1761      | 1817 | 1808    |
| 30   | 1138      | 1186 |         | 47   | 2714      | 2707 |         |
| 31   | 1106      | 1194 |         | 48   | 2979      | 3048 |         |
| 32   | 1155      | 1202 | 1191    | 49   | 2975      | 3086 |         |
| 33   | 1255      | 1305 |         | 50   | 2988      | 3087 |         |
| 34   | 1295      | 1319 |         | 51   | 3007      | 3138 |         |
| 35   | 1362      | 1334 |         | 52   | 3171      | 3359 |         |
| 36   | 1341      | 1362 |         | 53   | 3185      | 3431 |         |
| 37   | 1382      | 1438 |         | 54   | 3316      | 3481 |         |
| 38   | 1421      | 1447 |         | 55   | 3362      | 3546 | 3372    |
| 39   | 1463      | 1479 |         | 56   | 3615      | 3727 | 3585    |
| 40   | 1452      | 1485 |         | 57   | 3640      | 3734 |         |
| 41   | 1466      | 1593 | 1439    | MAE  | 32        |      |         |

The zwitterionic isomer very quickly interconverts into the global minimum CS01, in agreement with the literature consensus about its negligible contribution to the vibrational

spectrum. Figure (S2) shows the OH (black line) and NH (red line) distances during the dynamics of ZW01. We observe that the OH distance starts oscillating from the equilibrium one for ZW01, but after very short time it drops into the CS01 basin and the distance oscillates around the equilibrium one of CS01 reported with a black horizontal dashed line. A similar behavior is followed by NH distance.

Figure S2: Plot of NH and OH distances during the dynamics of ZW01. The black line reports the OH distance, while the red line the NH one. Horizontal dashed lines are centered at equilibrium distances for CS01 and ZW01.

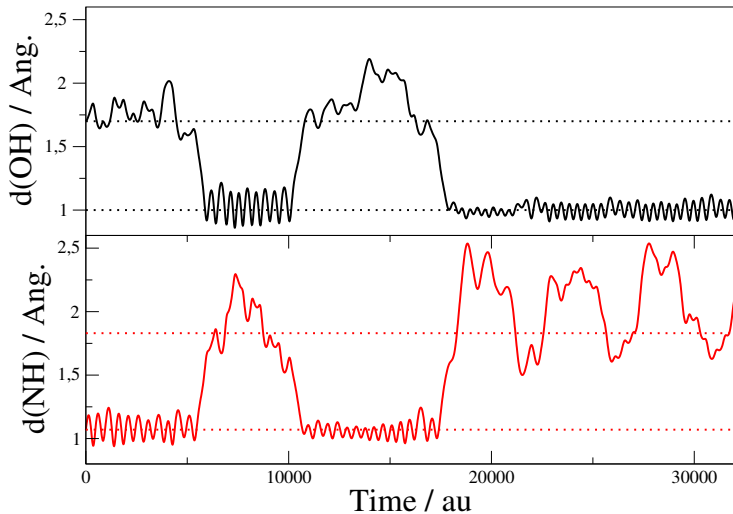

## $(\text{GlyH}+\text{H}_2)^+$ and $(\text{GlyH}+3\text{H}_2)^+$

In figure S3 the optimized structures of protonated glycine tagged with a single hydrogen molecule in front of the NH and of the OH bond are displayed. In Figure S4 is instead represented the protonated glycine tagged with three hydrogen molecules, with all NH bonds tagged. For all the calculations we employed the DFT-B3LYP level of theory with aug-cc-pvdz basis set, as implemented in the NWChem software package.

The four highest harmonic frequencies of each structure, together with semiclassical DC-SCIVR and classical estimates through the Fourier transform of the velocity autocorrelation function are reported in Table S7.

Figure S3: Minimum geometry of the protonated glycine tagged with hydrogen. On the left side the NH tagged structure is reported, while on the right side the hydrogen tag is on the OH.

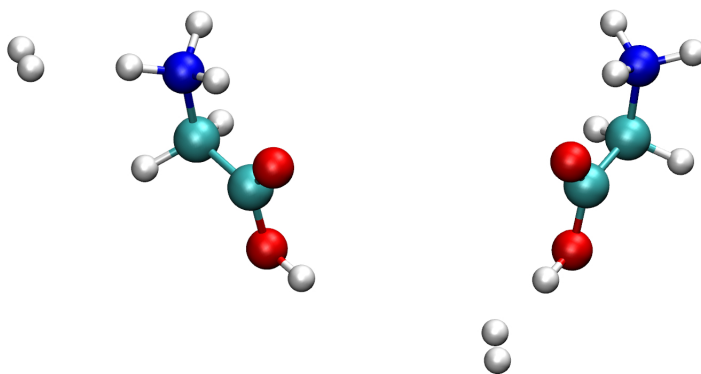

Figure S4: Minimum structure of protonated glycine tagged with three hydrogen molecules.

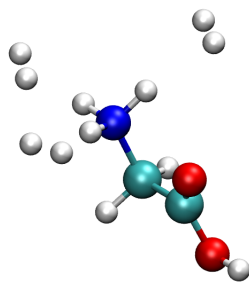

Table S7: Semiclassical (DC-SCIVR) vibrational frequencies of tagged glycine systems reported in  $\text{cm}^{-1}$ . Values are compared with their harmonic (HO) and classical counterparts.

| $(\text{GlyH}+\text{H}_2)^+$ (NH tagged) |          |      |           | $(\text{GlyH}+\text{H}_2)^+$ (OH tagged) |          |      |           |
|------------------------------------------|----------|------|-----------|------------------------------------------|----------|------|-----------|
| Mode                                     | DC-SCIVR | HO   | Classical | Mode                                     | DC-SCIVR | HO   | Classical |
| NHa                                      | 2920     | 3139 | 3030      | NHa                                      | 2950     | 3095 | 3035      |
| NHb                                      | 3310     | 3377 | 3310      | NHb                                      | 3340     | 3446 | 3340      |
| NHc                                      | 3370     | 3485 | 3370      | NHc                                      | 3370     | 3507 | 3350      |
| OHb                                      | 3610     | 3696 | 3600      | OHr                                      | 3480     | 3561 | 3485      |
| $(\text{GlyH}+3\text{H}_2)^+$            |          |      |           | $(\text{Deuterated GlyH}+3\text{H}_2)^+$ |          |      |           |
| Mode                                     | DC-SCIVR | HO   | Classical | Mode                                     | DC-SCIVR | HO   | Classical |
| NHa                                      | 3000     | 3312 | 3185      | NDa                                      | 2376     | 2517 | 2370      |
| NHb                                      | 3240     | 3367 | 3260      | NDb                                      |          | 3099 |           |
| NHc                                      | 3260     | 3410 | 3250      | NDc                                      |          | 3159 |           |
| OHb                                      | 3600     | 3701 | 3600      | OHb                                      |          | 3701 |           |

## Quantum Anharmonicity

In Fig.(S5) one can appreciate the amount of delocalization induced by the potential anharmonicity.

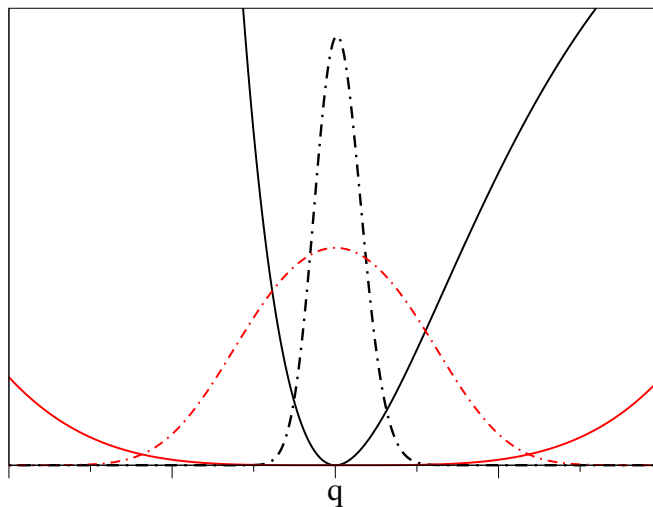

Figure S5: Continuous black line and red lines show potential energy profiles of a stiff and a mild oscillators, while black and red dashed lines their respective ground state wavefunctions.

# Theoretical methods employed for the calculation of vibrational frequencies

## Computational details

All preliminary optimization and harmonic frequency calculations, as well as the molecular dynamics simulations, have been performed employing the NWChem package,<sup>1</sup> and evaluating the electronic energy at the DFT-B3LYP level of theory.<sup>3</sup> Each classical trajectory was propagated for about 600 fs, which is a standard length for semiclassical simulations.<sup>4-10</sup> The same 6-311+G(d,p) basis set of Ref. ( 2) was used for the protonated glycine dimer, while the aug-cc-pvDZ basis set was employed for hydrogen-tagged protonated glycine molecules. This latter basis set has already been demonstrated to be reliable in previous semiclassical calculations, including neutral glycine.<sup>6,11,12</sup>

## Semiclassical approximation to the spectral density

The power spectrum of a molecular system described by the Hamiltonian  $\hat{H}$  can be written as  $I(E) \equiv \sum_i |\langle \chi | \psi_i \rangle|^2 \delta(E - E_i)$ .  $E_i$  is a generic eigenenergy we want to calculate and  $|\psi_i\rangle$  is the associated eigenfunction. By representing the Dirac-delta in terms of a Fourier integral, the spectrum becomes<sup>13</sup>

$$I(E) = \frac{1}{2\pi\hbar} \int_{-\infty}^{+\infty} dt e^{iEt/\hbar} \langle \chi | e^{-i\hat{H}t/\hbar} | \chi \rangle \quad (1)$$

where  $|\chi\rangle$  is an arbitrary quantum mechanical reference state. The semiclassical theory approximates the quantum time evolution operator  $e^{-i\hat{H}t/\hbar}$  by means of a stationary-phase approximation to the Feynman Path Integral representation.<sup>14</sup> The semiclassical propagator thus obtained is equal to the one proposed by van Vleck,<sup>15</sup> and it relies on the calculation of



all possible classical paths connecting the initial  $\mathbf{q}(0)$  and final  $\mathbf{q}(t)$  points. Thus, one needs to solve a nonlinear boundary value problem and to find all possible trajectories knowing the starting and ending positions. Finding these trajectories is a formidable task. In the seventies,<sup>16-19</sup> Miller introduced the Semiclassical Initial Value Representation (SC-IVR), by replacing the boundary condition summation with an initial phase space integration, which is amenable to Monte Carlo (MC) implementation. Later, Heller-Herman-Kluk-Kay pioneered a more suitable representation of the propagator for molecular systems, based on coherent states.<sup>13,20-22</sup> Coherent states have the advantage to feature a Gaussian-type shape centered at classical momenta and positions  $(\mathbf{p}(t), \mathbf{q}(t))$  in the coordinate representation, and they can be expressed for a F-dimensional system as

$$\langle \mathbf{x} | \mathbf{p}(t), \mathbf{q}(t) \rangle = \left( \frac{\det(\Gamma)}{\pi^F} \right)^{1/4} e^{-(\mathbf{x}-\mathbf{q}(t))^T \Gamma (\mathbf{x}-\mathbf{q}(t))/2 + i \mathbf{p}^T(t) (\mathbf{x}-\mathbf{q}(t))/\hbar}, \quad (2)$$

where  $\Gamma$  is a matrix describing the width of the wavepacket. Then, the semiclassical propagator becomes in this representation

$$\begin{aligned} & \langle \chi | e^{-i\hat{H}t/\hbar} | \chi \rangle \approx \\ & \left( \frac{1}{2\pi\hbar} \right)^F \iint d\mathbf{p}(0) d\mathbf{q}(0) C_t(\mathbf{p}(0), \mathbf{q}(0)) e^{\frac{i}{\hbar} S_t(\mathbf{p}(0), \mathbf{q}(0))} \langle \chi | \mathbf{p}(t) \mathbf{q}(t) \rangle \langle \mathbf{p}(0) \mathbf{q}(0) | \chi \rangle \end{aligned} \quad (3)$$

where  $(\mathbf{p}(0), \mathbf{q}(0))$  are the initial conditions of the classical trajectories that are evolved to  $(\mathbf{p}(t), \mathbf{q}(t))$ .  $S_t$  is the classical action computed at time  $t$ , while  $\langle \chi | \mathbf{p}(t) \mathbf{q}(t) \rangle \langle \mathbf{p}(0) \mathbf{q}(0) | \chi \rangle$  is the product of two coherent-state overlaps, which is analytical. Finally,  $C_t$  is the pre-exponential factor arising from the quantum fluctuations around the classical paths,<sup>4</sup> that is calculated from the monodromy (stability) matrix elements as

$$C_t(\mathbf{p}(0), \mathbf{q}(0)) = \sqrt{\det \left| \frac{1}{2} \left( \frac{\partial \mathbf{q}(t)}{\partial \mathbf{q}(0)} + \frac{\partial \mathbf{p}(t)}{\partial \mathbf{p}(0)} - i\hbar \Gamma \frac{\partial \mathbf{q}(t)}{\partial \mathbf{p}(0)} + \frac{i}{\Gamma \hbar} \frac{\partial \mathbf{p}(t)}{\partial \mathbf{q}(0)} \right) \right|}. \quad (4)$$

The convergence of Eq. (3) with the number of phase space trajectories can be tamed by

applying the Time-Averaging filtering technique developed by Kaledin and Miller<sup>23,24</sup> and, by approximating  $C_t(\mathbf{p}(0), \mathbf{q}(0)) \approx e^{i\phi_t/\hbar}$ , to obtain the following semiclassical power spectrum expression

$$I(E) = \left(\frac{1}{2\pi\hbar}\right)^F \iint d\mathbf{p}(0) d\mathbf{q}(0) \frac{1}{2\pi\hbar T} \left| \int_0^T e^{\frac{i}{\hbar}[S_t(\mathbf{p}(0), \mathbf{q}(0)) + Et + \phi_t]} \langle \chi | \mathbf{p}(t), \mathbf{q}(t) \rangle dt \right|^2. \quad (5)$$

This formulation requires roughly 1000 trajectories per degree of freedom, which makes any on-the-fly ab initio molecular dynamics approach unaffordable. In the recent years, one of us developed a formulation of Eq. (5) able to recover accurate spectra by means of few or even a single trajectory by properly selecting the initial conditions and tailoring the reference state  $|\chi\rangle$ <sup>9,12</sup>. More specifically, we choose the initial conditions  $(\mathbf{p}(0), \mathbf{q}(0))$  at the molecular equilibrium configuration  $\mathbf{q}_{eq}$ , while the momentum of each degree of freedom is such that  $p_{eq}^i = \sqrt{\hbar\omega_i(n_i + 1/2)}$  according to its harmonic frequency  $\omega_i$ . For the ground state trajectory  $n_i = 0$  for each degree of freedom. Also, we enforce the reference state to be of the type  $|\chi\rangle = |\mathbf{p}_{eq}, \mathbf{q}_{eq}\rangle + \varepsilon |-\mathbf{p}_{eq}, \mathbf{q}_{eq}\rangle$ . With a proper choice of the  $\varepsilon$  vector elements, we can filter the signal and selectively enhance the signal of the ZPE or of any given fundamental excitation<sup>11,25</sup>. For instance, if we select each element to be equal to one, i.e.  $\varepsilon = +\mathbf{1}$ , the ZPE will be recovered. By selecting  $\varepsilon_i = -1$  with all the other values equal to +1, the fundamental excitation of mode  $i$  will be mainly reproduced with respect to the other vibrational peaks. By combining these strategies, one can employ just a few or even a single classical trajectory to obtain accurate spectroscopic signals for systems as complex as glycine.<sup>6</sup> Unfortunately, this approach runs out of steam when the system dimensionality increases to 25-30 degrees of freedom, because of the curse of dimensionality. To overcome this issue, we have recently developed the divide-and-conquer SC-IVR (DC-SCIVR) method which was shown to be able to recover spectra of high-dimensional molecular systems.<sup>5,7</sup>

## Divide-and-Conquer semiclassical molecular dynamics<sup>7</sup>

Our Divide-and-Conquer method reproduces the full-dimensional molecular spectrum as a combination of reduced dimensionality spectra, each one composed of a reduced number of vibrational degrees of freedom. The power spectrum for a reduced  $M$ -dimensional vibrational space, extracted from the full  $N_{vib}$ -dimensional vibrational space ( $M < N_{vib}$ ), is given in analogy to Eq. (5) by

$$\tilde{I}(E) = \left(\frac{1}{2\pi\hbar}\right)^F \iint d\tilde{\mathbf{p}}(0) d\tilde{\mathbf{q}}(0) \frac{1}{2\pi\hbar T} \left| \int_0^T e^{\frac{i}{\hbar}[\tilde{S}_t(\tilde{\mathbf{p}}(0), \tilde{\mathbf{q}}(0)) + Et + \tilde{\phi}_t]} \langle \tilde{\chi} | \tilde{\mathbf{p}}(t), \tilde{\mathbf{q}}(t) \rangle dt \right|^2, \quad (6)$$

where the  $\sim$  indicates the reduced dimensionality quantities. These quantities are obtained by projection via singular value decomposition of the corresponding full dimensional ones.<sup>5,7,26</sup> The criterion that we employed to partition the  $N_{vib}$  degrees of freedom into groups of subspaces is by inspection of the magnitude of the off-diagonal terms of the time-averaged Hessian matrix elements  $H_{ij}$  along the trajectory started at equilibrium  $(\mathbf{p}_{eq}, \mathbf{q}_{eq})$ . After choosing a certain threshold value  $\varepsilon$ , if a generic Hessian element  $H_{ij} \geq \varepsilon$ , then modes  $i$  and  $j$  are collected in the same subspace. The  $\varepsilon$  parameter is chosen in order to have a maximum subspace dimensionality not exceeding 15-20, which is a good compromise between accuracy and feasibility of the power spectrum calculations. Specifically, for the CS01 isomer of the protonated glycine, the maximum subspace dimensionality was equal to 16, while for CS02 it was 18. In the case of hydrogen tagged protonated glycine the maximum subspace dimensionality was selected to be equal to 19. More details on the method have been provided elsewhere.<sup>5</sup> In conclusion, all semiclassical vibrational spectra have been calculated employing the DC-SCIVR approach, which has already been demonstrated to be able to reproduce spectra of variously sized molecules, up to 60 atoms, either under strong or weak interactions, such as hydrogen bonds in water clusters or in the protonated water dimer (Zundel cation).<sup>5,7,27</sup> Each excitation was selected by properly tailoring the reference

state  $|\chi\rangle$  according to the Multiple Coherent state approach mentioned above.

## Classical evaluation of the vibrational frequencies

To appreciate the relevance of quantum effects better, we have reported in the article some classical estimates for the vibrational frequencies of the hydrogen tagged systems. A standard classical simulation would require a preliminary thermalization of the system at the temperature of the experiment followed by the computation of the Fourier transform of the velocity-velocity autocorrelation function. However, the reference experiments were performed at very low temperature (10K and 21K) and such a classical simulation would have basically returned harmonic estimates. We decided to work instead in analogy to the divide-and-conquer formula for semiclassical calculations by adopting its classical analog

$$I_{cl}(E) = \lim_{T \rightarrow \infty} \int \int d\tilde{q}_0 d\tilde{p}_0 \tilde{\rho}(\tilde{q}_0, \tilde{p}_0) \frac{1}{2T} \left| \int_0^T dt e^{iE(t)} \tilde{v}(t) \right|^2, \quad (7)$$

where  $\tilde{\rho}(\tilde{q}_0, \tilde{p}_0)$  is the same sampling phase-space distribution function in reduced dimensionality employed in the semiclassical simulations, i.e. the set of classical trajectories are the same. The details about the derivation of the formula can be found in Ref. 27.

## References

- (1) Valiev, M.; Bylaska, E.; Govind, N.; Kowalski, K.; Straatsma, T.; Dam, H. V.; Wang, D.; Nieplocha, J.; Apra, E.; Windus, T.; de Jong, W. NWChem: A comprehensive and scalable open-source solution for large scale molecular simulations. *Comput. Phys. Commun.* **2010**, *181*, 1477–1489.
- (2) Wu, R.; McMahon, T. B. Infrared multiple photon dissociation spectra of proline and glycine proton-bound homodimers. Evidence for zwitterionic structure. *J. Am. Chem. Soc.* **2007**, *129*, 4864–4865.

- (3) Becke, A. D. Density functional thermochemistry. III. The role of exact exchange. *J. Chem. Phys.* **1993**, *98*, 5648–5652.
- (4) Di Liberto, G.; Ceotto, M. The Importance of the Pre-exponential Factor in Semiclassical Molecular Dynamics. *J. Chem. Phys.* **2016**, *145*, 144107.
- (5) Liberto, G. D.; Conte, R.; Ceotto, M. 'Divide and conquer' semiclassical molecular dynamics: A practical method for spectroscopic calculations of high dimensional molecular systems. *J. Chem. Phys.* **2018**, *148*, 014307.
- (6) Gabas, F.; Conte, R.; Ceotto, M. On-the-fly ab initio Semiclassical Calculation of Glycine Vibrational Spectrum. *J. Chem. Theory Comput.* **2017**, *13*, 2378.
- (7) Ceotto, M.; Di Liberto, G.; Conte, R. Semiclassical 'Divide-and-Conquer' Method for Spectroscopic Calculations of High Dimensional Molecular Systems. *Phys. Rev. Lett.* **2017**, *119*, 010401.
- (8) Ceotto, M.; Valleau, S.; Tantardini, G. F.; Aspuru-Guzik, A. First principles semiclassical calculations of vibrational eigenfunctions. *J. Chem. Phys.* **2011**, *134*, 234103.
- (9) Ceotto, M.; Atahan, S.; Tantardini, G. F.; Aspuru-Guzik, A. Multiple coherent states for first-principles semiclassical initial value representation molecular dynamics. *J. Chem. Phys.* **2009**, *130*, 234113.
- (10) Ceotto, M.; Dell' Angelo, D.; Tantardini, G. F. Multiple coherent states semiclassical initial value representation spectra calculations of lateral interactions for CO on Cu (100). *J. Chem. Phys.* **2010**, *133*, 054701.
- (11) Conte, R.; Aspuru-Guzik, A.; Ceotto, M. Reproducing Deep Tunneling Splittings, Resonances, and Quantum Frequencies in Vibrational Spectra From a Handful of Direct Ab Initio Semiclassical Trajectories. *J. Phys. Chem. Lett.* **2013**, *4*, 3407–3412.

- (12) Ceotto, M.; Atahan, S.; Shim, S.; Tantardini, G. F.; Aspuru-Guzik, A. First-principles semiclassical initial value representation molecular dynamics. *Phys. Chem. Chem. Phys.* **2009**, *11*, 3861–3867.
- (13) Heller, E. J. The semiclassical way to molecular spectroscopy. *Acc. Chem. Res.* **1981**, *14*, 368–375.
- (14) Feynman, R. P.; Hibbs, A. R. *Quantum mechanics and path integrals*; McGraw-Hill, 1965.
- (15) Van Vleck, J. H. The correspondence principle in the statistical interpretation of quantum mechanics. *Proc. Natl. Acad. Sci.* **1928**, *14*, 178–188.
- (16) Miller, W. H. Semiclassical Theory of Atom–Diatom Collisions: Path Integrals and the Classical S Matrix. *J. Chem. Phys.* **1970**, *53*, 1949–1959.
- (17) Miller, W. H. Semiclassical nature of atomic and molecular collisions. *Accounts of Chemical Research* **1971**, *4*, 161–167.
- (18) Miller, W. H. Classical S Matrix: Numerical Application to Inelastic Collisions. *J. Chem. Phys.* **1970**, *53*, 3578–3587.
- (19) Miller, W. H. Classical-limit quantum mechanics and the theory of molecular collisions. *Adv. Chem. Phys.* **1974**, *25*, 69–177.
- (20) Heller, E. J. Frozen Gaussians: A very simple semiclassical approximation. *J. Chem. Phys.* **1981**, *75*, 2923–2931.
- (21) Herman, M. F.; Kluk, E. A semiclassical justification for the use of non-spreading wavepackets in dynamics calculations. *Chem. Phys.* **1984**, *91*, 27–34.
- (22) Kay, K. G. Semiclassical initial value treatments of atoms and molecules. *Annu. Rev. Phys. Chem.* **2005**, *56*, 255–280.

- (23) Kaledin, A. L.; Miller, W. H. Time averaging the semiclassical initial value representation for the calculation of vibrational energy levels. *J. Chem. Phys.* **2003**, *118*, 7174–7182.
- (24) Kaledin, A. L.; Miller, W. H. *J. Chem. Phys.* **2003**, *119*, 3078–3084.
- (25) Ceotto, M.; Tantardini, G. F.; Aspuru-Guzik, A. Fighting the curse of dimensionality in first-principles semiclassical calculations: Non-local reference states for large number of dimensions. *J. Chem. Phys.* **2011**, *135*, 214108.
- (26) Hinsen, K.; Kneller, G. R. Projection Methods for the Analysis of Complex Motions in Macromolecules. *Mol. Simul.* **2000**, *23*, 275–292.
- (27) Di Liberto, G.; Conte, R.; Ceotto, M. 'Divide-and-conquer' semiclassical molecular dynamics: An application to water clusters. *J. Chem. Phys.* **2018**, *148*, 104302.
